# Supplementary material for: Localization of a red fluorescence protein adsorbed on wild type and mutant spores of Bacillus subtilis
Source: PubMed Central journal article supplement (PMC5016992; doi:10.1186/s12934-016-0551-2), 2016-09-08
Supplement: 12934_2016_551_MOESM2_ESM.pdf [file 12934_2016_551_MOESM2_ESM.pdf]

**Additional Table 1.**

**Densitometric analysis of dot blot experiments with the pellets of the adsorption reaction with wild type and *cotH* mutant spores.**

| <b>mRFP source</b>   | <b>Amount of sample used</b> | <b>Density (OD/mm<sup>2</sup>)<sup>a</sup></b> | <b>Amount of mRFP (ng)<sup>b</sup></b> | <b>mRFP <math>\mu</math>g in 200 <math>\mu</math>l (% total)<sup>b</sup></b> |
|----------------------|------------------------------|------------------------------------------------|----------------------------------------|------------------------------------------------------------------------------|
| <b>Purified mRFP</b> | 50.0 ng                      | 74.35                                          | NA                                     | NA                                                                           |
|                      | 25.0 ng                      | 42.31                                          | NA                                     | NA                                                                           |
|                      | 12.5 ng                      | 17.80                                          | NA                                     | NA                                                                           |
|                      | 6.25 ng                      | 6.89                                           | NA                                     | NA                                                                           |
| <b>wt</b>            | 5.0 x10 <sup>6</sup>         | 59.14                                          | 39.28                                  | 3.4 (68%)                                                                    |
|                      | 2.5 x10 <sup>6</sup>         | 39.05                                          | 17.33                                  |                                                                              |
|                      | 1.25x10 <sup>6</sup>         | 7.43                                           | 7.85                                   |                                                                              |
| <b><i>cotH</i></b>   | 5.0 x10 <sup>6</sup>         | 72.25                                          | 48.5                                   | 4.43 (92.6%)                                                                 |
|                      | 2.5 x10 <sup>6</sup>         | 58.75                                          | 26.1                                   |                                                                              |
|                      | 1.25x10 <sup>6</sup>         | 115.52                                         | 10.9                                   |                                                                              |

---

<sup>a</sup> Density measured by optical density (OD) per square millimeter and obtained by ChemiDocXRS apparatus with Quantity-One software (Bio-Rad).

<sup>b</sup> Calculated from signals (density OD/mm<sup>2</sup>) obtained with purified mRFP.  
NA, not applicable.
