# Supplementary material for: Localization of a red fluorescence protein adsorbed on wild type and mutant spores of Bacillus subtilis
Source: PubMed Central journal article supplement (PMC5016992; doi:10.1186/s12934-016-0551-2), 2016-09-08
Supplement: 12934_2016_551_MOESM3_ESM.pdf [file 12934_2016_551_MOESM3_ESM.pdf]

**Additional Table 2.**

Densitometric analysis of dot blot experiments with the supernatants of the adsorption reaction performed with different amounts of mRFP and with wild type and *cotH* mutant spores

| mRFP source           | Amount of sample used | Density (OD/mm <sup>2</sup> ) <sup>a</sup> | Amount of mRFP (ng) <sup>b</sup> | mRFP µg in 200 µl (% total) <sup>b</sup> |
|-----------------------|-----------------------|--------------------------------------------|----------------------------------|------------------------------------------|
| <b>Purified mRFP</b>  | 100.0 ng              | 193.17                                     | NA                               | NA                                       |
|                       | 50.0 ng               | 83.52                                      | NA                               | NA                                       |
|                       | 25.0 ng               | 39.28                                      | NA                               | NA                                       |
|                       | 12.5 ng               | 13.92                                      | NA                               | NA                                       |
| <b>wt 2</b>           | 80.0 µl               | 160.77                                     | 85.52                            | 0.182 (9.12%)                            |
|                       | 40.0 µl               | 60.83                                      | 35.33                            |                                          |
|                       | 20.0 µl               | 19.42                                      | 15.92                            |                                          |
| <b><i>cotH</i> 2</b>  | 80.0 µl               | 114.15                                     | 57.30                            | 0.107 (5.35%)                            |
|                       | 40.0 µl               | 40.8                                       | 27.25                            |                                          |
| <b>wt 5</b>           | 20.0 µl               | 128.77                                     | 69.23                            | 0.57 (11.4%)                             |
|                       | 10.0 µl               | 56.83                                      | 33.33                            |                                          |
| <b><i>cotH</i> 5</b>  | 20.0 µl               | 42.35                                      | 26.30                            | 0.32 (6,4%)                              |
|                       | 10.0 µl               | 16.04                                      | 15.85                            |                                          |
| <b>wt 10</b>          | 5.0 µl                | 157.99                                     | 83.52                            | 2.96 (29.6%)                             |
|                       | 2.5 µl                | 65.36                                      | 38.33                            |                                          |
|                       | 1.2 µl                | 43.01                                      | 27.12                            |                                          |
| <b><i>cotH</i> 10</b> | 20.0 µl               | 193.61                                     | 101.30                           | 1.29 (12.9%)                             |
|                       | 10.0 µl               | 120.52                                     | 65.25                            |                                          |
|                       | 5.0 µl                | 66.32                                      | 39.11                            |                                          |
| <b>wt20</b>           | 2.5 µl                | 166.25                                     | 88.25                            | 7.43 (37.15%)                            |
|                       | 1.2 µl                | 75.55                                      | 44.09                            |                                          |
| <b><i>cotH</i>20</b>  | 2.5 µl                | 60.78                                      | 35.78                            | 2.96 (14.8%)                             |
|                       | 1.25 µl               | 42.31                                      | 26.80                            |                                          |

<sup>a</sup> Density measured by optical density (OD) per square millimeter and obtained by ChemiDocXRS apparatus with Quantity-One software (Bio-Rad).

<sup>b</sup> Calculated from signals (density OD/mm<sup>2</sup>) obtained with purified mRFP. NA, not applicable.
