# Supplementary material for: Localization of a red fluorescence protein adsorbed on wild type and mutant spores of Bacillus subtilis
Source: PubMed Central journal article supplement (PMC5016992; doi:10.1186/s12934-016-0551-2), 2016-09-08
Supplement: 12934_2016_551_MOESM4_ESM.pdf [file 12934_2016_551_MOESM4_ESM.pdf]

**Additional Table 3.**

**Densitometric analysis of dot blot experiments with the supernatants of adsorption reaction ( $5 \times 10^8$  of cotH mutant spores - 2  $\mu$ g of mRFP) and of washes with 1x PBS pH7.0 or 1M NaCl-0.1% Triton 100.**

| <b>mRFP source</b>                | <b>Amount of sample used</b> | <b>Density (OD/mm<sup>2</sup>)<sup>a</sup></b> | <b>Amount of mRFP (ng)<sup>b</sup></b> | <b>mRFP <math>\mu</math>g in 200 <math>\mu</math>l (% total)<sup>b</sup></b> |
|-----------------------------------|------------------------------|------------------------------------------------|----------------------------------------|------------------------------------------------------------------------------|
| <b>Purified mRFP</b>              | 25.0 ng                      | 25.125                                         | NA                                     | NA                                                                           |
|                                   | 12.50 ng                     | 10.78.40                                       | NA                                     | NA                                                                           |
|                                   | 6.25 ng                      | 4.62                                           | NA                                     | NA                                                                           |
| <b>Unbound mRFP</b>               | 40.0 $\mu$ l                 | 11.56                                          | 12.55                                  | 0.083 ( 4.3%)                                                                |
|                                   | 20.0 $\mu$ l                 | 6.89                                           | 7.78                                   |                                                                              |
|                                   | 10.0 $\mu$ l                 | 2.99                                           | 3.55                                   |                                                                              |
| <b><u>1x PBS pH 7.0</u></b>       |                              |                                                |                                        |                                                                              |
| <b>5 min</b>                      | 40.0 $\mu$ l                 | 20.75                                          | 19.23                                  | 0.092 (4.8%)                                                                 |
|                                   | 20.0 $\mu$ l                 | 13.42                                          | 12.92                                  |                                                                              |
| <b>10 min</b>                     | 20.0 $\mu$ l                 | 12.5                                           | 13.03                                  | 0.107 (5.6%)                                                                 |
|                                   | 10.0 $\mu$ l                 | 7.2                                            | 7.25                                   |                                                                              |
| <b>15 min</b>                     | 20.0 $\mu$ l                 | 11.77                                          | 12.83                                  | 0.111 (5.8%)                                                                 |
|                                   | 10.0 $\mu$ l                 | 6.83                                           | 5.33                                   |                                                                              |
| <b>30 min</b>                     | 20.0 $\mu$ l                 | 17.35                                          | 15.30                                  | 0.122 (6.4%)                                                                 |
|                                   | 10.0 $\mu$ l                 | 6.04                                           | 5.85                                   |                                                                              |
| <b><u>1M NaCl-0.1% Triton</u></b> |                              |                                                |                                        |                                                                              |
| <b>5 min</b>                      | 80.0 $\mu$ l                 | 18.5                                           | 20.03                                  | 0.053 (2.8%)                                                                 |
|                                   | 40.0 $\mu$ l                 | 10.2                                           | 11.25                                  |                                                                              |
| <b>10 min</b>                     | 40.0 $\mu$ l                 | 14.83                                          | 15.89                                  | 0.084 (4.4%)                                                                 |
|                                   | 20.0 $\mu$ l                 | 8.02                                           | 8.78                                   |                                                                              |
| <b>15 min</b>                     | 20.0 $\mu$ l                 | 12.25                                          | 13.01                                  | 0.115 (6.2%)                                                                 |
|                                   | 10.0 $\mu$ l                 | 7.28                                           | 7.31                                   |                                                                              |
| <b>30 min</b>                     | 20.0 $\mu$ l                 | 15.31                                          | 16.80                                  | 0.164 (8.6%)                                                                 |
|                                   | 10.0 $\mu$ l                 | 6.59                                           | 7.58                                   |                                                                              |

<sup>a</sup> Density measured by optical density (OD) per square millimeter and obtained by ChemiDocXRS apparatus with Quantity-One software (Bio-Rad).

<sup>b</sup> Calculated from signals (density OD/mm<sup>2</sup>) obtained with purified mRFP. NA, not applicable.
