# Supplementary material for: Localization of a red fluorescence protein adsorbed on wild type and mutant spores of Bacillus subtilis
Source: PubMed Central journal article supplement (PMC5016992; doi:10.1186/s12934-016-0551-2), 2016-09-08

**A**

Spore surface

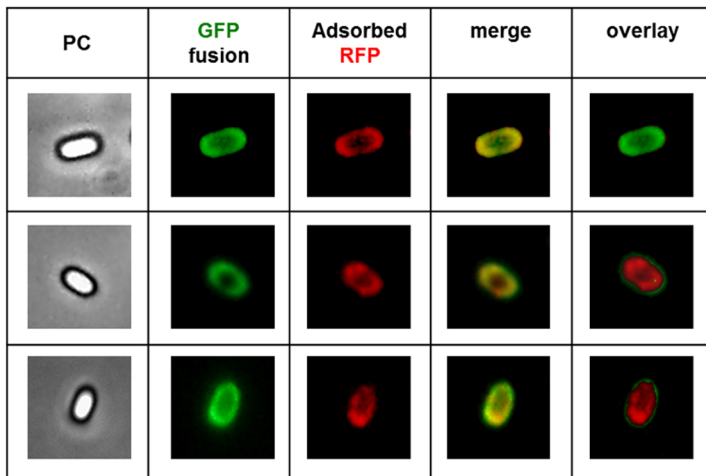**B**

Spore surface

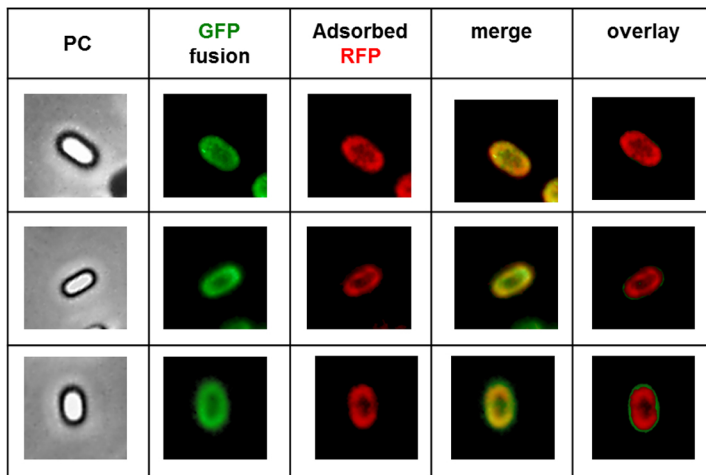

Supplement: 12934_2016_551_MOESM5_ESM.pdf [file 12934_2016_551_MOESM5_ESM.pdf]
