# Supplementary material for: Localization of a red fluorescence protein adsorbed on wild type and mutant spores of Bacillus subtilis
Source: PubMed Central journal article supplement (PMC5016992; doi:10.1186/s12934-016-0551-2), 2016-09-08
Supplement: 12934_2016_551_MOESM6_ESM.pdf [file 12934_2016_551_MOESM6_ESM.pdf]

**Additional Table 3.*****Bacillus subtilis* strains.**

| <b>Strain</b> | <b>Genotype</b>                   | <b>Source</b> |
|---------------|-----------------------------------|---------------|
| PY79          | <i>wild type</i>                  | [25]          |
| ER220         | <i>cotH::spc</i>                  | [21]          |
| AZ573         | <i>cotZ::gfp</i>                  | [5]           |
| DS127         | <i>cotC::gfp</i>                  | [35]          |
| AZ644         | <i>cotS::gfp</i>                  | [24]          |
| AZ645         | <i>cotS::gfp ΔcotG ΔcotH::neo</i> | [24]          |
| RH2466        | <i>pspollQ::gfp</i>               | This study    |
| RH285         | <i>pSpollQ::gfp cotH::spc</i>     | This study    |
| RH282         | <i>yhcN::gfp</i>                  | This study    |
| RH284         | <i>yhcN::gfp cotH::spc</i>        | This study    |
| AZ636         | <i>cotC::gfp ΔcotG ΔcotH::neo</i> | This study    |
| RH278         | <i>cotZ::gfp cotH::spc</i>        | This study    |
