# Supplementary material for: Localization of a red fluorescence protein adsorbed on wild type and mutant spores of Bacillus subtilis
Source: PubMed Central journal article supplement (PMC5016992; doi:10.1186/s12934-016-0551-2), 2016-09-08
Supplement: 12934_2016_551_MOESM7_ESM.pdf [file 12934_2016_551_MOESM7_ESM.pdf]

#### Additional Table 4.

#### List of oligonucleotides used to prime amplification reactions.

| Primer   | Sequence <sup>a</sup>            | Restriction site |
|----------|----------------------------------|------------------|
| spollQ-F | ttcgaaATGAAGGCCATAAGTGAGCGGATGC  | <i>HindIII</i>   |
| spollQ-R | ctgcagTTCCTCTCTCATGTTTCATCACCTC  | <i>PstI</i>      |
| yhcN-F   | ttcgaaATGTTTGGAAAAAACAAGTCCTTGCG | <i>HindIII</i>   |
| yhcN-R   | ctgcagAGCGTTAGGGAATACACGCTG      | <i>PstI</i>      |

<sup>a</sup> Not capital letters indicate restriction recognition sites.
